# Supplementary material for: Copper accelerates photochemically induced radical chemistry of iron-containing SOA
Source: Copernicus journal article supplement (doi:10.5194/egusphere-2024-3226), 2024-10-22
Supplement: Supplementary file [file egusphere-2024-3226-AC1-supplement.pdf]

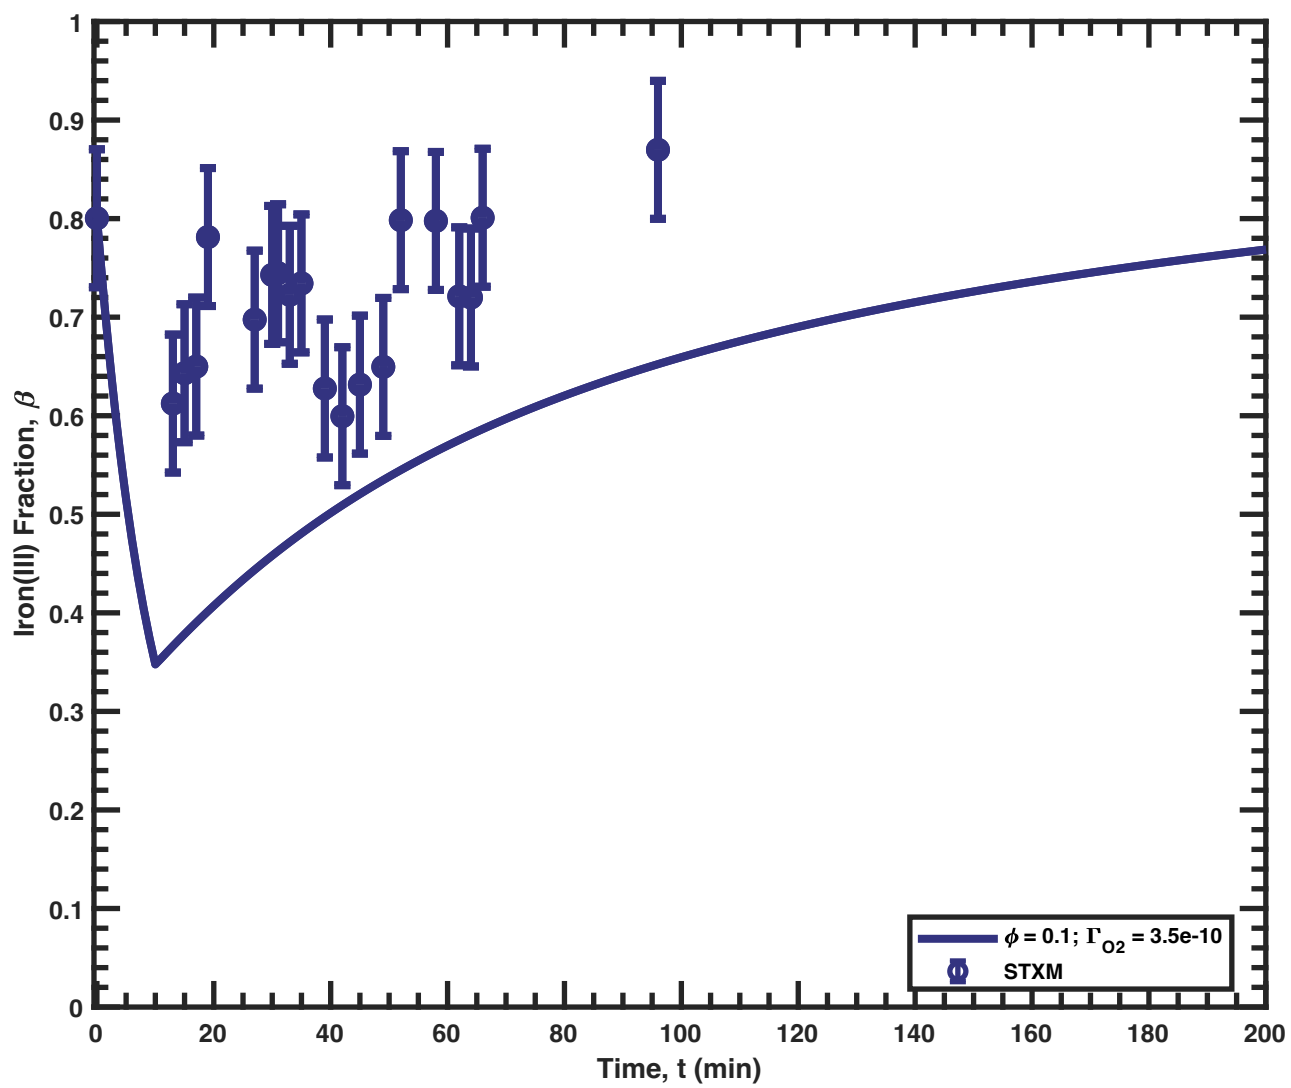

## 510 **G2 Calculation of reacto-diffusive length for O<sub>2</sub>**

We know from Hanson et al. (1994) that the reacto-diffusive length is defined as:

$$l_D = \sqrt{\frac{D_l}{k^I}}, \quad (\text{G1})$$

whereas  $D_l$  is the liquid phase diffusion coefficient (taken from Dou et al. (2021)) and  $k^I$  describes the sum of the oxygen sinks corresponding to the turnover rate of reaction R2 in Table 3 ( $3.9 \times 10^{-2} \text{ M s}^{-1}$ ) in our case divided by the O<sub>2</sub> concentration in

515 steady state ( $C_{ss}$  in *moles*, taken from Figure F4). In this case, it is equivalent to:

$$k^I = \frac{k^{R2}}{C_{ss}}, \quad (\text{G2})$$

This leads to a reacto-diffusive length,  $l_D$ , for oxygen of  $2.66 \times 10^{-8} \text{ m}$ .

*Author contributions.* MA, PAP and KK designed the research. LT, RKYC, PAP and KK carried out the STXM/NEXAFS measurements. PAP and KK did the modeling work with valuable inputs by MA. KK wrote the manuscript with significant inputs by PAP and MA.

520 *Competing interests.* At least one of the (co-)authors is a member of the editorial board of Atmospheric Chemistry and Physics

*Disclaimer.* TEXT

*Acknowledgements.* The authors thank the Swiss National Science Foundation for financial support with grants no. 188662 and 189883. The authors thank Prof. Christian Ludwig for having facilitated this work and LT's salary was funded by the Swiss National Foundation (project no. 184817). In situ electron and X-ray absorption spectroscopy experiments were hosted at the POLLUX Beamline at the Swiss

525 Light Source (SLS), the support of which is highly appreciated.
